# Supplementary material for: Rh(iii) hydroxocomplexes speciation using HPLC-ESI-MS
Source: Royal Society of Chemistry journal article supplement (doi:10.1039/d0ay00363h), 2020-01-01
Supplement: d0ay00363h1.pdf [file d0ay00363h1.pdf]

## Supplementary materials

### Rh(III) hydroxocomplexes speciation using HPLC-ESI-MS

Victoria V. Volchek<sup>a,\*</sup>, Semen N. Berdyugin<sup>a</sup>, Olga V. Shuvaeva<sup>a</sup>, Dmitriy G. Sheven<sup>a</sup>, Danila B. Vasilchenko<sup>a</sup>, Sergey V. Korenev<sup>a</sup>

a. Nikolaev Institute of Inorganic Chemistry, 3 Acad. Lavrentiev Ave., Novosibirsk, Russia, 630090

\*Corresponding author

E-mail: [volchek@niic.nsc.ru](mailto:volchek@niic.nsc.ru)

**Table S1.** Peak assignment for ESI-MS

| assignment                                                                                    | exp  | calc   |
|-----------------------------------------------------------------------------------------------|------|--------|
| $[\text{Na}^+ + 3\text{ACN}]^+$                                                               | 146  | 146.0  |
| $[\text{DS}^- + \text{H}^+ + \text{Na}^+ + \text{ACN}]^+$                                     | 330  | 330.2  |
| $[\text{DS}^- + 2\text{Na}^+ + 2\text{ACN}]^+$                                                | 339  | 339.2  |
| $[\text{SDS} + \text{Na}^+ + \text{ACN}]^+$ [31]                                              | 352  | 352.1  |
| $[2\text{DS}^- + 2\text{H}^+ + \text{Na}^+]^+$                                                | 555  | 555.3  |
| $[2\text{SDS} + \text{H}^+]^+$                                                                | 577  | 577.3  |
| $[2\text{SDS} + \text{Na}^+]^+$ [37]                                                          | 599  | 599.3  |
| $[\text{SDS} + \text{Na}^+ + \text{ACN} + \text{DS}^- + \text{H}^+]^+$                        | 618  | 618.3  |
| $[2\text{SDS} + \text{Na}^+ + \text{ACN}]^+$                                                  | 640  | 640.3  |
| $[2\text{SDS} + \text{H}^+ + \text{Na}^+ + \text{ClO}_4^-]^+$                                 | 699  | 699.2  |
| $[2\text{SDS}^- + \text{Na}^+ + 3\text{ACN}]^+$                                               | 722  | 722.3  |
| $[\text{Rh}(\text{H}_2\text{O})_6 + 2\text{DS}^-]^+$                                          | 741  | 741.3  |
| $[3\text{DS}^- + 3\text{H}^+ + \text{Na}^+]^+$                                                | 821  | 821.5  |
| $[2\text{DS}^- + 2\text{H}^+ + \text{Na}^+ + \text{SDS}]^+$                                   | 843  | 843.4  |
| $[3\text{SDS} + \text{H}^+]^+$                                                                | 865  | 865.4  |
| $[3\text{SDS} + \text{Na}^+]^+$ [31]                                                          | 887  | 887.4  |
| $[\text{Rh}_2(\text{OH})_3(\text{H}_2\text{O})_7 + 2\text{DS}^-]^+$                           | 913  | 913.2  |
| $[3\text{SDS} + \text{H}^+ + \text{Na}^+ + \text{ClO}_4^-]^+$                                 | 987  | 987.3  |
| $[\text{Rh}(\text{H}_2\text{O})_6 + 3\text{DS}^- + \text{H}^+]^+$                             | 1007 | 1007.4 |
| $[3\text{SDS}^- + \text{Na}^+ + 3\text{ACN}]^+$                                               | 1010 | 1010.5 |
| $[\text{Rh}(\text{H}_2\text{O})_6 + 2\text{DS}^- + \text{SDS}]^+$                             | 1029 | 1029.4 |
| $[3\text{DS}^- + 3\text{H}^+ + \text{Na}^+ + \text{SDS}]^+$                                   | 1109 | 1109.6 |
| $[2\text{DS}^- + 2\text{H}^+ + \text{Na}^+ + 2\text{SDS}]^+$                                  | 1132 | 1131.6 |
| $[4\text{SDS} + \text{H}^+]^+$                                                                | 1154 | 1153.6 |
| $[4\text{SDS} + \text{Na}^+]^+$                                                               | 1175 | 1175.5 |
| $[\text{Rh}_2(\text{OH})_3(\text{H}_2\text{O})_7 + 3\text{DS}^- + \text{H}^+]^+$              | 1179 | 1179.3 |
| $[4\text{SDS} + \text{H}^+ + \text{Na}^+ + \text{ClO}_4^-]^+$                                 | 1275 | 1275.5 |
| $[\text{Rh}(\text{H}_2\text{O})_6 + 3\text{DS}^- + \text{H}^+ + \text{SDS}]^+$                | 1295 | 1295.6 |
| $[4\text{SDS}^- + \text{Na}^+ + 3\text{ACN}]^+$                                               | 1298 | 1298.6 |
| $[\text{Rh}(\text{H}_2\text{O})_6 + 2\text{DS}^- + 2\text{SDS}]^+$                            | 1317 | 1317.5 |
| $[3\text{DS}^- + 3\text{H}^+ + \text{Na}^+ + 2\text{SDS}]^+$                                  | 1398 | 1397.7 |
| $[2\text{DS}^- + 2\text{H}^+ + \text{Na}^+ + 3\text{SDS}]^+$                                  | 1420 | 1419.7 |
| $[5\text{SDS} + \text{H}^+]^+$                                                                | 1442 | 1441.7 |
| $[5\text{SDS} + \text{Na}^+]^+$                                                               | 1464 | 1463.7 |
| $[\text{Rh}_2(\text{OH})_3(\text{H}_2\text{O})_7 + 3\text{DS}^- + \text{H}^+ + \text{SDS}]^+$ | 1467 | 1467.5 |

|                                                                      |      |        |
|----------------------------------------------------------------------|------|--------|
| $[5\text{SDS}+\text{H}^++\text{Na}^++\text{ClO}_4^-]^+$              | 1563 | 1563.6 |
| $[5\text{SDS}^-+\text{Na}^++3\text{ACN}]^+$                          | 1587 | 1586.8 |
| $[\text{Rh}_3(\text{OH})_4(\text{H}_2\text{O})_{10}+4\text{DS}^-]^+$ | 1617 | 1617.4 |
| $[3\text{DS}^-+3\text{H}^++\text{Na}^++3\text{SDS}]^+$               | 1685 | 1685.9 |
| $[2\text{DS}^-+2\text{H}^++\text{Na}^++4\text{SDS}]^+$               | 1707 | 1707.9 |
| $[6\text{SDS}+\text{H}^+]$                                           | 1730 | 1729.8 |
| $[3\text{DS}^-+3\text{H}^++\text{Na}^++4\text{SDS}]^+$               | 1974 | 1974.0 |
| $[2\text{DS}^-+2\text{H}^++\text{Na}^++5\text{SDS}]^+$               | 1996 | 1996.0 |
| $[7\text{SDS}+\text{H}^+]$                                           | 2018 | 2018.0 |
| $[\text{Rh}_4(\text{OH})_6(\text{H}_2\text{O})_{12}+5\text{DS}^-]^+$ | 2055 | 2055.5 |

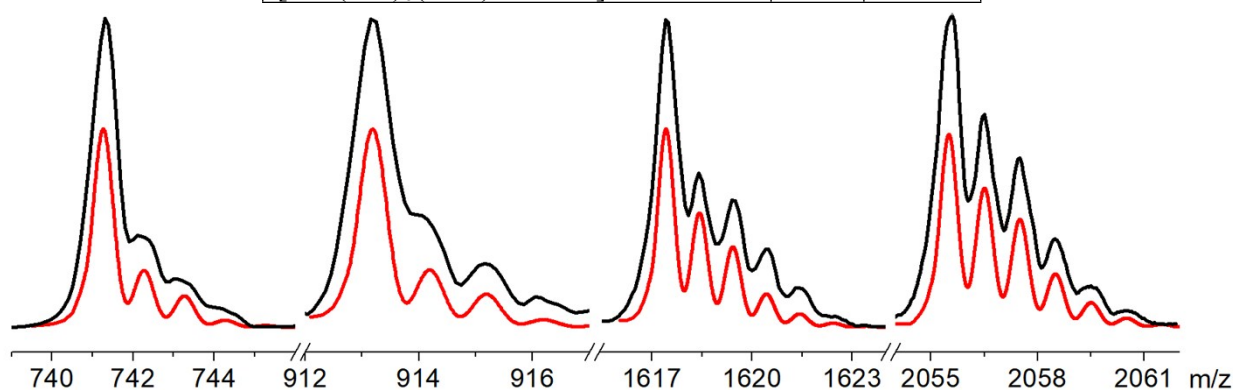

**Fig. S1.** The ESI mass spectra of the Rh(III) polynuclear complexes during HPLC-analysis. Experimental data is shown with black line; red line corresponds to the distribution patterns calculated for  $[\text{Rh}(\text{H}_2\text{O})_6 \times 2(\text{C}_{12}\text{H}_{25}\text{SO}_4)]$ ,  $[\text{Rh}_2(\text{OH})_3(\text{H}_2\text{O})_7 \times 2(\text{C}_{12}\text{H}_{25}\text{SO}_4)]$ ,  $[\text{Rh}_3(\text{OH})_4(\text{H}_2\text{O})_{10} \times 4(\text{C}_{12}\text{H}_{25}\text{SO}_4)]$  and  $[\text{Rh}_4(\text{OH})_6(\text{H}_2\text{O})_{12} \times 5(\text{C}_{12}\text{H}_{25}\text{SO}_4)]$ , respectively.

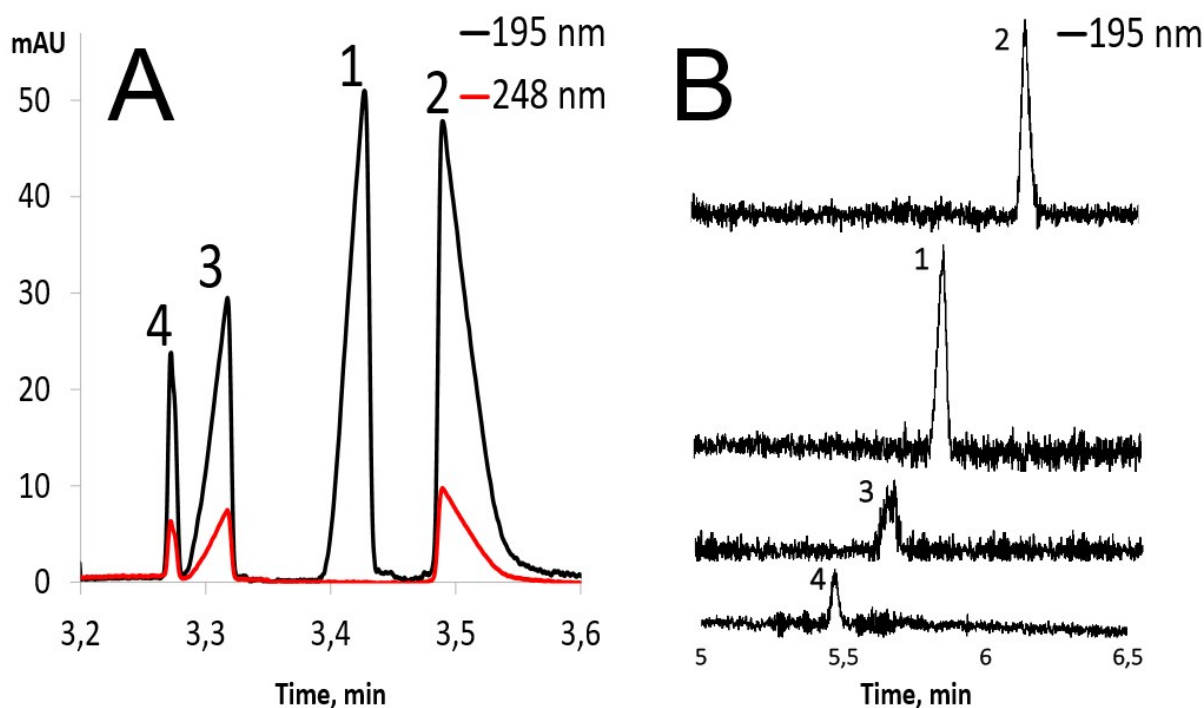

**Fig. S2.** CZE electropherograms of  $[\text{Rh}_y(\text{OH})_m(\text{H}_2\text{O})_{z-m}]^{3y-m}$ . A – CZE analysis of the mixture of polynuclear complexes (in accordance with [17]); B – CZE analysis of the collected fractions (1-4) after HPLC separation.
